# Supplementary material
Source: Royal Society of Chemistry journal article supplement (doi:10.1039/d6nr00818f)
Supplement: d6nr00818f1.pdf [file d6nr00818f1.pdf]

## Supporting information

### High-performance self-powered photodetector based on Te/Si heterojunctions

Quanyu Lu<sup>a</sup>, Changhui Du<sup>\*a</sup>, Yunjie Liu<sup>b</sup>, Xiaoyang Li<sup>a</sup>, Ran Yan<sup>a</sup>, Mingcong Zhang<sup>a</sup>,  
Hecong Wang<sup>a</sup>, Mingyang Cai<sup>a</sup>, Wenqiang Wang<sup>a</sup>, Kaiyi Cheng<sup>a</sup>, Lanzhong Hao<sup>\*a</sup>

a. School of Materials Science and Engineering, China University of Petroleum,  
Qingdao, Shandong, 266580, P. R. China. E-mail: [haolanzhong@upc.edu.cn](mailto:haolanzhong@upc.edu.cn)

b. College of Science, China University of Petroleum, Qingdao, Shandong, 266580, P.  
R. China

**\*Corresponding author:** [haolanzhong@upc.edu.cn](mailto:haolanzhong@upc.edu.cn)

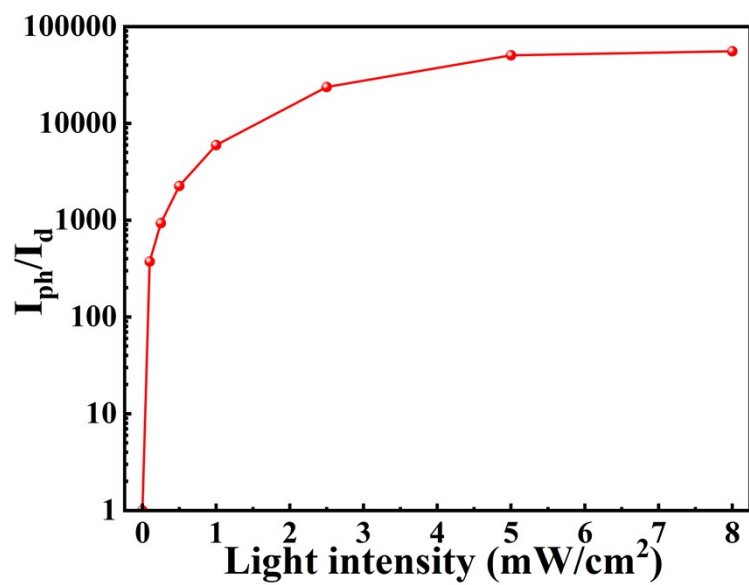

Fig. S1. Photocurrent/dark current at different light intensities.

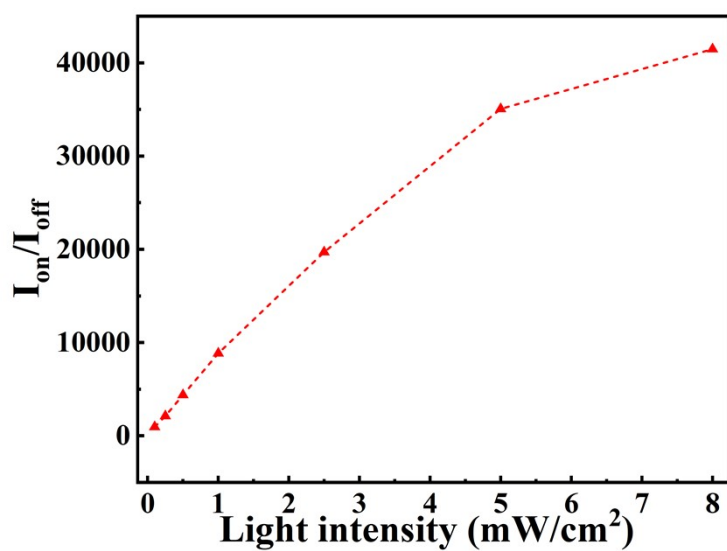

Fig. S2. On/off ratio at different light intensities.

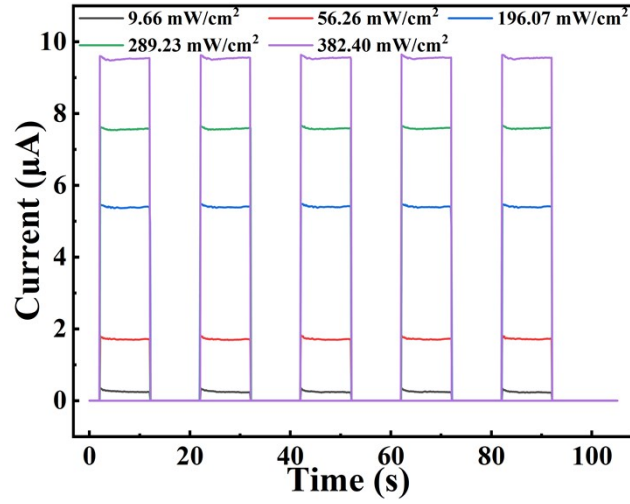

**Fig. S3.** Dynamic photoresponse curves of a 520 nm laser at different light intensities under zero bias.

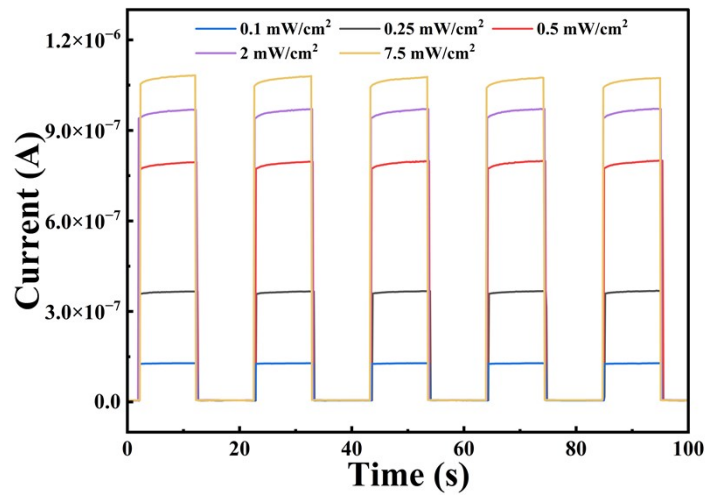

**Fig. S4.** Dynamic photoresponse curves of a 980 nm laser at different light intensities under zero bias.

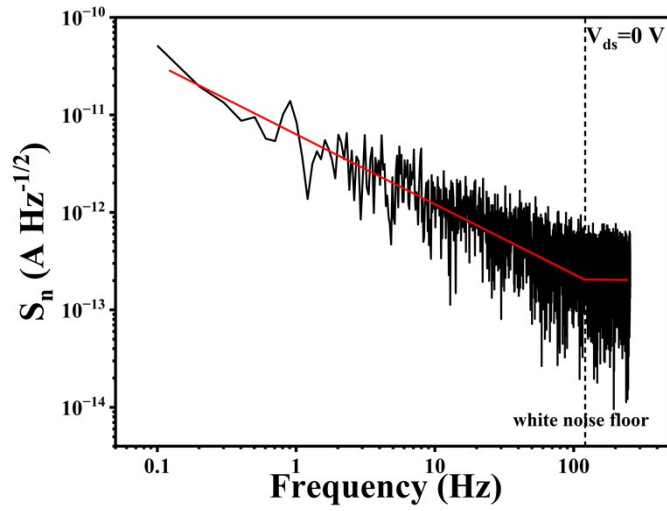

Fig. S5. Noise spectrum of the Te/Si heterojunction.

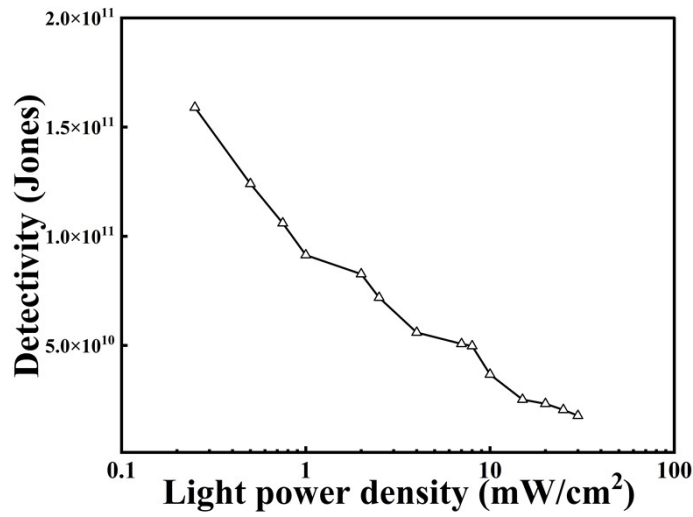

Fig. S6. Detectability of Te/Si heterojunction calculated using NEP.
